# Supplementary material for: Neurodevelopment, vision and auditory outcomes at age 2 years in offspring of participants in the ‘Women First’ maternal preconception nutrition randomised controlled trial
Source: HighWire-hosted journal article supplement (doi:10.1136/archdischild-2023-325352), 2023-05-04
Supplement: archdischild-2023-325352supp001_data_supplement.pdf [file archdischild-2023-325352supp001_data_supplement.pdf]

**Supplemental Information**

- S1 Table: Nutrient content of lipid-based micro-nutrient supplement (SQ-LNS).
- S2 Figure: Study Design & Follow-up.
- S3 Table: INTER-NDA thresholds for delay according to the INTERGROWTH-21<sup>st</sup> Project International INTER-NDA standards for child development at two years of age.
- S4 Supporting Information: Auditory Cortical Evoked Response Potentials experiment protocol.
- S5 Table: Proportional contribution of study site and arm to Early Child Development outcomes at the 2-year follow-up.
- S6 Table: Correlations between Early Child Development Outcomes and Early Life Exposures.
- S7 Table: Comparisons of Early Life Exposures between children with delay/low vision and without delay/low vision.

**S1** Nutrient content of lipid-based micro-nutrient supplement (SQ-LNS).

| <b>Nutrient</b>           | <b>Amount</b> |
|---------------------------|---------------|
| Energy, kcal              | 118           |
| Protein, g                | 2.6           |
| Fat, g                    | 10            |
| Linoleic acid, g          | 4.6           |
| A-Linolenic acid, g       | 0.6           |
| Calcium, mg               | 280           |
| Copper, mg                | 4             |
| Folate, µg                | 400           |
| Iodine, µg                | 250           |
| Iron, mg                  | 20            |
| Magnesium, mg             | 65            |
| Manganese, mg             | 2.6           |
| Niacin, mg                | 36            |
| Pantothenic acid (B5), mg | 7             |
| Phosphorus, mg            | 190           |
| Potassium, mg             | 200           |
| Riboflavin (B2), mg       | 2.8           |
| Selenium, µg              | 130           |
| Thiamine (B1), mg         | 2.8           |
| Vitamin A, µg             | 800           |
| Vitamin B12, µg           | 5.2           |
| Vitamin B6, mg            | 3.8           |
| Vitamin C, mg             | 100           |
| Vitamin D2, IU            | 1000          |
| Vitamin E, mg             | 20            |
| Vitamin K, µg             | 45            |
| Zinc, mg                  | 15            |
| <b>Total daily dose</b>   | <b>20 g</b>   |

Source: Hambidge, K.M., Krebs, N.F., Westcott, J.E. *et al.* Preconception maternal nutrition: a multi-site randomized controlled trial. *BMC Pregnancy Childbirth* **14**, 111 (2014). <https://doi.org/10.1186/1471-2393-14-11>.

## S2 Study Design & Follow-up.

| Timeline ► | Preconceptional period   | Prenatal period            | 0 (Birth)               |                     | 12 months           | 24 months           |                        |                                            |                 |
|------------|--------------------------|----------------------------|-------------------------|---------------------|---------------------|---------------------|------------------------|--------------------------------------------|-----------------|
| Arm ▼      | Maternal supplementation | Maternal supplementation n | Birth & health outcomes | Weight, length & HC | Weight, length & HC | Weight, length & HC | Family care indicators | ECD assessment: INTER-NDA, vision, CA-ERPs | Health outcomes |
| 1          |                          |                            |                         |                     |                     |                     |                        |                                            |                 |
| 2          |                          |                            |                         |                     |                     |                     |                        |                                            |                 |
| 3          |                          |                            |                         |                     |                     |                     |                        |                                            |                 |

ECD: Early child development; INTER-NDA: The INTERGROWTH-21<sup>st</sup> Neurodevelopment Assessment; CA-ERPs: Cortical Auditory Evoked Response Potentials

**S3 INTER-NDA thresholds for delay according to the INTERGROWTH-21<sup>st</sup> Project International INTER-NDA standards for child development at two years of age.**

| INTER-NDA domain                      | Pooled Centiles (n=1181) |      |      |      |       |       |       |
|---------------------------------------|--------------------------|------|------|------|-------|-------|-------|
|                                       | c3                       | c10  | c25  | c50  | c75   | c90   | c97   |
| <b>Cognitive<sup>1</sup></b>          | 27.4                     | 38.5 | 62.2 | 79.5 | 88.8  | 92.6  | 99.6  |
| <b>Fine motor<sup>1</sup></b>         | 17.5                     | 25.7 | 74.2 | 91.4 | 100.0 | 100.0 | 100.0 |
| <b>Gross motor<sup>1</sup></b>        | 31.1                     | 51.7 | 66.7 | 81.6 | 100.0 | 100.0 | 100.0 |
| <b>Language<sup>1</sup></b>           | 12.1                     | 17.8 | 45.7 | 71.7 | 88.5  | 95.1  | 100.0 |
| <b>Positive behaviour<sup>1</sup></b> | 37.8                     | 51.4 | 70.0 | 90.0 | 100.0 | 100.0 | 100.0 |
| <b>Negative behaviour<sup>2</sup></b> | 0.0                      | 0.0  | 0.0  | 25.0 | 25.0  | 50.0  | 76.5  |

INTER-NDA: The INTERGROWTH-21<sup>st</sup> Neurodevelopment Assessment

<sup>1</sup>For these domains, higher scores reflect better outcomes; the thresholds for severe delay and mild-to-moderate delay are defined as  $\leq 3^{\text{rd}}$  and  $3^{\text{rd}}$ - $10^{\text{th}}$  centiles. The threshold for *any* delay is defined as  $\leq 10^{\text{th}}$  centile.

<sup>2</sup>For negative behaviour, lower scores reflect better outcomes; the thresholds for severe delay and mild-to-moderate delay are defined as  $\geq 97^{\text{th}}$  and  $90^{\text{th}}$ - $97^{\text{th}}$  centiles. The threshold for *any* delay is defined as  $\geq 90^{\text{th}}$  centile.

Source: Fernandes M, Villar J, Stein A, Urias ES, Garza C, Victora CG, Barros FC, Bertino E, Purwar M, Carvalho M, Giuliani F. INTERGROWTH-21st Project international INTER-NDA standards for child development at 2 years of age: an international prospective population-based study. *BMJ open*. 2020 Jun 1;10(6):e035258.

#### **S4 Auditory Cortical Evoked Response Potentials experiment protocol.**

##### *Cortical auditory evoked response potentials (CA-ERP) acquisition:*

The ability of children to detect and discriminate novel auditory events was assessed by measuring CA-ERPs to the 'novelty oddball' ERP task using wireless, gel-free electroencephalography (EEG). In the novelty oddball task, three types of auditory stimuli were presented to the child: (i) pure sinusoidal tones (1.5 kHz, 200 ms long, 5 ms rise and fall time, 70 dB SPL) repeated at high probability ('frequent'); (ii) pure sinusoidal tones (2 kHz, 200 ms long, 5 ms rise and fall time, 70 dB Sound Pressure Level, SPL) repeated at low probability ('infrequent'); and (iii) trial-unique novel stimuli presented at low probability e.g. dog bark, bell ring ('novel'). Two-blocks of 700 stimuli each were presented (560 frequent, 70 infrequent and 70 novels). The duration of each stimulus was 200 ms with an onset asynchrony of 700 ms.

In this study, we implemented the EEG acquisition and extraction protocol as described by Kihara et al<sup>1</sup>. Auditory stimuli were presented to the child through earphones integrated into a wireless EEG recording cap (Enobio® EEG systems<sup>2</sup>). EEG was recorded at a sampling rate of 500 Hz (band-pass 0.1–70 Hz) from midline leads at Fz, Cz and Pz; lateral leads T3, T4, T5, T6; an ocular lead Fp2 and the left mastoid process (M2). All locations were referenced to the left mastoid (M2). Impedances were maintained at  $\leq 10$  k $\Omega$ . The operational manual for the auditory assessment is available at <https://www.intergrowth21.org.uk>.

##### *CA-ERP Processing:*

EEG processing was undertaken in MATLAB 2019a (© 1994-2021 The MathWorks, Inc.). EEG data were band-pass filtered offline at between 0.5 and 10 Hz using a feed-forward zero-phase filter. All trials were baseline corrected. Trials containing amplitude deflections exceeding  $\pm 75$   $\mu$ V were rejected, as they were considered affected by external and/or physiological artifacts. ERP waveforms were visually identified. For the analysis of infrequent and novel stimuli, all artifact-free trials were employed. In order to maintain an equal distribution of frequent, infrequent and novel tones, and to provide similar signal-to-noise ratios, the frequent stimulus immediately preceding each infrequent stimulus were selected for averaging<sup>1</sup>. A minimum of 20 trials for each stimulus was required for inclusion of an individual average ERP waveform.

The components of interest were the: P1, N2 and P3a, automatically detected in the time frames 70–110 ms, 210–270 ms and 270–370 ms, respectively, from midline and temporal locations<sup>1</sup>. In children, these peaks are the typical components observed in a passive auditory novelty oddball. The P1 is a positive peak around 100 ms after stimulus onset and represents an obligatory cortical auditory ERP reflecting sensory encoding of auditory stimuli<sup>3</sup>. The N2 is a negative peak around 200 ms after stimulus onset and represents a response to deviations in a prevailing stimulus<sup>4</sup>. The P3a is a positive peak around 250–350 ms, and represents involuntary orienting of attention to

distracting/unexpected environmental sounds occurring among frequently repeated tones<sup>5</sup>.

The ERP metrics studied in this analysis in a given epoch, for each peak, are: (1) the Maximum Amplitude ( $A_{\max}$ ) ERP peak (expressed in microvolts,  $\mu\text{V}$ ), calculated as the maximum amplitude in the observation window; and (2) the latency ( $T_{\text{lat}}$ ) of the ERP peak (expressed in ms) defined as the duration from stimulus presentation to  $A_{\max}$ <sup>1</sup>. For comparison between study arms, values were averaged across the 4 temporal electrodes.

### References:

1. Kihara M, Hogan AM, Newton CR, Garrashi HH, Neville BR, de Haan M. Auditory and visual novelty processing in normally-developing Kenyan children. *Clinical Neurophysiology*. 2010 Apr 1;121(4):564-76.
2. <https://www.neuroelectrics.com/solutions/enobio>
3. Sharma A, Kraus N, McGee TJ, Nicol TG. Developmental changes in P1 and N1 central auditory responses elicited by consonant-vowel syllables. *Electroencephalography and Clinical Neurophysiology/Evoked Potentials Section*. 1997 Nov 1;104(6):540-5.
4. Naatanen R, Picton T. N2 and Automatic Versus Controlled Processes, *Cerebral Psychophysiology. Studies at Event-Related Potentials*. McCallum WC, Zappoli R, Denoth I (Ed),(EEG Suppl. 38).
5. Soltani M, Knight RT. Neural origins of the P300. *Critical Reviews™ in Neurobiology*. 2000;14(3-4).

**Table S5 Proportional contribution of study site and arm to Early Child Development outcomes at the 2-year follow-up.**

| Study Site                | Arm                                     |                                     |                   | Total<br>N(%)      |
|---------------------------|-----------------------------------------|-------------------------------------|-------------------|--------------------|
|                           | Arm 1:<br>Preconception<br>intervention | Arm 2:<br>Pregnancy<br>intervention | Arm 3:<br>Control |                    |
| <b>INTER-NDA Outcomes</b> |                                         |                                     |                   |                    |
| DRC (n)                   | 43                                      | 44                                  | 47                | 134 (20.1)         |
| Guatemala (n)             | 51                                      | 61                                  | 61                | 173 (25.9)         |
| India (n)                 | 56                                      | 60                                  | 53                | 169 (25.3)         |
| Pakistan (n)              | 67                                      | 65                                  | 59                | 191 (28.7)         |
| <b>Total (n, %)</b>       | <b>217 (32.5)</b>                       | <b>230 (34.5)</b>                   | <b>220 (33.0)</b> | <b>667 (100)</b>   |
| <b>Vision Outcomes</b>    |                                         |                                     |                   |                    |
| DRC (n)                   | 43                                      | 38                                  | 44                | 125 (19.9)         |
| Guatemala (n)             | 49                                      | 57                                  | 57                | 163 (26.0)         |
| India (n)                 | 52                                      | 57                                  | 52                | 161 (25.7)         |
| Pakistan (n)              | 59                                      | 60                                  | 59                | 178 (28.4)         |
| <b>Total (n, %)</b>       | <b>203 (32.4)</b>                       | <b>212 (33.8)</b>                   | <b>212 (33.8)</b> | <b>627 (100.0)</b> |
| <b>CA-ERP Outcomes</b>    |                                         |                                     |                   |                    |
| DRC (n)                   | 8                                       | 10                                  | 3                 | 21 (16.9)          |
| Guatemala (n)             | 12                                      | 7                                   | 13                | 32 (25.8)          |
| India (n)                 | 12                                      | 12                                  | 13                | 37 (29.8)          |
| Pakistan (n)              | 13                                      | 11                                  | 10                | 34 (27.4)          |
| <b>Total (n, %)</b>       | <b>45 (36.3)</b>                        | <b>40 (32.3)</b>                    | <b>39 (31.5)</b>  | <b>124 (100)</b>   |

INTER-NDA: The INTERGROWTH-21<sup>st</sup> Neurodevelopment Assessment;  
DRC = Democratic Republic of the Congo; CA-ERP: Cortical auditory evoked response potentials.

Table S6 Correlations between Early Child Development Outcomes and Early Life Exposures.

|                                                            | Vision<br>n=613 |                      | INTER-NDA scores<br>n=667 |            |             |          |                    |                    | ERP Latencies<br>n=123 |                 |            |               |                 |            |                |                  |             | ERP maximum amplitudes<br>n=123 |                 |            |               |                 |            |                |                  |             |
|------------------------------------------------------------|-----------------|----------------------|---------------------------|------------|-------------|----------|--------------------|--------------------|------------------------|-----------------|------------|---------------|-----------------|------------|----------------|------------------|-------------|---------------------------------|-----------------|------------|---------------|-----------------|------------|----------------|------------------|-------------|
|                                                            | Visual Acuity   | Contrast Sensitivity | Cognition                 | Fine Motor | Gross Motor | Language | Positive Behaviour | Negative Behaviour | P1 - frequent          | P1 - infrequent | P1 - novel | N2 - frequent | N2 - infrequent | N2 - novel | P3a - frequent | P3a - infrequent | P3a - novel | P1 - frequent                   | P1 - infrequent | P1 - novel | N2 - frequent | N2 - infrequent | N2 - novel | P3a - frequent | P3a - infrequent | P3a - novel |
| Age at INTER-NDA assessment                                | r               | -0.05                | -0.08                     | 0.14       | 0.13        | 0.01     | 0.03               | 0.06               | -0.02                  | 0.24            | 0.1        | 0.0           | 0.1             | 0.0        | 0.0            | 0.1              | 0.1         | 0.1                             | -0.27           | 0.1        | 0.0           | 0.1             | 0.1        | 0.1            | 0.0              | 0.1         |
|                                                            | p               | 0.24                 | 0.04*                     | <0.01**    | <0.01**     | 0.81     | 0.48               | 0.11               | 0.57                   | 1*              | 0          | 4             | 9               | 4          | 6              | 9                | 7           | 0                               | 0               | <0.01**    | 8             | 7               | 8          | 6              | 9                | 8           |
| Maternal age at birth                                      | r               | 0.12                 | 0.10                      | -0.06      | -0.06       | -0.02    | 0.06               | 0.00               | -0.02                  | 0.0             | 0.0        | 0.1           | 0.1             | 0.1        | 0.0            | 0.1              | 0.1         | 0.1                             | -0.04           | 0.1        | 0.1           | 0.0             | 0.0        | 0.0            | 0.0              |             |
|                                                            | p               | <0.001**             | 0.01*                     | 0.10       | 0.14        | 0.71     | 0.12               | 0.92               | 0.56                   | 1               | 7          | 6             | 5               | 6          | 8              | 1                | 1           | 6                               | 0.65            | 4*         | 2             | 4               | 4          | 4              | 3                | 8           |
| Number of previous pregnancies                             | r               | -0.09                | -0.03                     | -0.08      | -0.03       | -0.01    | -0.13              | -0.02              | 0.01                   | 0.0             | 0.1        | 0.1           | 0.0             | 0.0        | 0.0            | 0.0              | 0.0         | 0.0                             | -0.05           | 0.1        | 0.1           | 0.0             | 0.1        | 0.1            | 0.0              |             |
|                                                            | p               | 0.02*                | 0.46                      | 0.04*      | 0.50        | 0.83     | <0.01**            | 0.54               | 0.90                   | 7               | 5          | 0             | 5               | 0          | 3              | 5                | 0           | 7                               | 0.60            | 8          | 8             | 0               | 1          | 5              | 6                | 6           |
| Gestational age at birth, in weeks                         | r               | -0.14                | -0.11                     | 0.15       | 0.07        | 0.06     | 0.15               | 0.04               | -0.07                  | 0.1             | 0.1        | 0.0           | 0.1             | 0.0        | 0.0            | 0.0              | 0.0         | 0.0                             | -0.01           | 0.0        | 0.1           | 0.0             | 0.0        | 0.1            | 0.2              |             |
|                                                            | p               | <0.001**             | 0.02*                     | <0.01**    | 0.13        | 0.20     | <0.01**            | 0.37               | 0.14                   | 5               | 4          | 5             | 7               | 9          | 7              | 0                | 7           | 2                               | 0.91            | 4          | 3             | 1               | 9          | 3              | 4*               | 9           |
| Number of hospital admissions in the first 2 years of life | r               | 0.13                 | 0.07                      | -0.02      | -0.18       | -0.03    | -0.11              | 0.03               | 0.02                   | 0.1             | 0.1        | 0.0           | 0.0             | 0.1        | 0.1            | 0.0              | 0.0         | 0.14                            | 0.6             | 0.1        | 0.0           | 0.1             | 0.0        | 0.0            | 0.1              |             |
|                                                            | p               | 0.44                 | 0.64                      | 0.92       | 0.25        | 0.84     | 0.49               | 0.86               | 0.90                   | 0               | 4          | 5             | 8               | 0          | 1              | 4                | 5           | 8                               | -0.14           | 6          | 1             | 4               | 9          | 4              | 4                | 4           |
| LAZ <sub>birth</sub>                                       | r               | -0.08                | -0.08                     | 0.16       | 0.07        | 0.13     | -0.15              | 0.04               | -0.04                  | 0.0             | 0.0        | 0.0           | 0.0             | 0.0        | 0.0            | 0.0              | 0.0         | 0.0                             | -0.19           | 0.1        | 0.1           | 0.0             | 0.1        | 0.0            | 0.1              |             |
|                                                            | p               | 0.06                 | 0.04*                     | <0.01**    | 0.06        | <0.01**  | <0.01**            | 0.29               | 0.35                   | 4               | 5          | 1             | 9               | 7          | 2              | 6                | 4           | 4                               | 0.04*           | 9          | 0             | 3*              | 9          | 8              | 4                | 4           |
| LAZ <sub>12</sub>                                          | r               | -0.17                | -0.19                     | 0.28       | 0.18        | 0.22     | 0.28               | 0.15               | -0.07                  | 0.0             | 0.0        | 0.1           | 0.0             | 0.0        | 0.0            | 0.0              | 0.0         | 0.0                             | -0.01           | 0.0        | 0.1           | 0.0             | 0.1        | 0.0            | 0.0              |             |
|                                                            | p               | <0.001**             | <0.01**                   | <0.01**    | <0.01**     | <0.01**  | <0.01**            | <0.01**            | 0.09                   | 5               | 8          | 5             | 2               | 3          | 3              | 3                | 1           | 5                               | 0.88            | 9          | 5             | 3               | 6          | 2              | 8                | 6           |
| LAZ <sub>24</sub>                                          | r               | -0.20                | -0.19                     | 0.34       | 0.25        | 0.29     | 0.34               | 0.20               | -0.11                  | 0.0             | 0.0        | 0.0           | 0.0             | 0.0        | 0.0            | 0.1              | 0.0         | 0.05                            | 0.0             | 0.1        | 0.0           | 0.1             | 0.0        | 0.0            | 0.0              |             |



|                                       |   |          |          |          |          |          |          |          |          |      |      |      |      |      |       |      |      |      |      |       |      |      |       |      |      |      |       |
|---------------------------------------|---|----------|----------|----------|----------|----------|----------|----------|----------|------|------|------|------|------|-------|------|------|------|------|-------|------|------|-------|------|------|------|-------|
|                                       | p | <0.001** | <0.001** | <0.001** | <0.001** | <0.001** | <0.001** | <0.001** | 0.01*    | 0.36 | 0.41 | 0.89 | 0.43 | 0.64 | 0.36  | 0.96 | 0.59 | 0.19 | 0.97 | 0.58  | 0.60 | 0.19 | 0.38  | 0.25 | 0.54 | 0.78 | 0.63  |
| WAZ <sub>birth</sub>                  | r | -0.04    | -0.05    | 0.14     | 0.08     | 0.15     | 0.11     | 0.00     | -0.01    | 0.05 | 0.18 | 0.06 | 0.13 | 0.14 | 0.03  | 0.01 | 0.00 | 0.01 | 0.00 | -0.17 | 0.09 | 0.20 | 0.08  | 0.00 | 0.05 | 0.19 | 0.01  |
|                                       | p | 0.38     | 0.26     | <0.001** | 0.05     | <0.001** | 0.01*    | 0.97     | 0.75     | 0.62 | 0.05 | 0.55 | 0.85 | 0.16 | 0.14  | 0.71 | 0.93 | 0.42 | 0.22 | 0.09  | 0.06 | 0.35 | 0.03* | 0.41 | 0.32 | 0.58 | 0.04* |
| WAZ <sub>12</sub>                     | r | -0.18    | -0.17    | 0.25     | 0.19     | 0.19     | 0.26     | 0.05     | -0.03    | 0.09 | 0.14 | 0.07 | 0.04 | 0.01 | 0.02  | 0.04 | 0.06 | 0.10 | 0.03 | -0.04 | 0.02 | 0.00 | 0.04  | 0.00 | 0.00 | 0.04 | 0.06  |
|                                       | p | <0.001** | <0.001** | <0.001** | <0.001** | <0.001** | <0.001** | 0.20     | 0.42     | 0.34 | 0.12 | 0.48 | 0.63 | 0.90 | 0.85  | 0.67 | 0.51 | 0.27 | 0.73 | 0.64  | 0.81 | 0.98 | 0.68  | 0.62 | 0.27 | 0.99 | 0.68  |
| WAZ <sub>24</sub>                     | r | -0.17    | -0.16    | 0.27     | 0.21     | 0.24     | 0.30     | 0.08     | -0.02    | 0.09 | 0.10 | 0.02 | 0.00 | 0.00 | 0.01  | 0.00 | 0.05 | 0.02 | 0.04 | -0.04 | 0.04 | 0.06 | 0.07  | 0.00 | 0.00 | 0.02 | 0.02  |
|                                       | p | <0.001** | <0.001** | <0.001** | <0.001** | <0.001** | <0.001** | 0.05     | 0.53     | 0.33 | 0.30 | 0.79 | 0.67 | 0.99 | 0.90  | 0.98 | 0.62 | 0.20 | 0.66 | 0.65  | 0.68 | 0.55 | 0.45  | 0.35 | 0.55 | 0.88 | 0.68  |
| HCAZ <sub>birth</sub>                 | r | -0.12    | -0.09    | 0.16     | 0.08     | 0.07     | 0.20     | 0.05     | -0.13    | 0.10 | 0.07 | 0.03 | 0.06 | 0.12 | 0.20  | 0.03 | 0.00 | 0.05 | 0.02 | -0.05 | 0.14 | 0.14 | 0.06  | 0.00 | 0.00 | 0.01 | 0.03  |
|                                       | p | <0.001** | 0.03*    | <0.001** | 0.05     | 0.06     | <0.001** | 0.24     | <0.001** | 0.30 | 0.48 | 0.71 | 0.54 | 0.08 | 0.03* | 0.66 | 0.57 | 0.56 | 0.57 | 0.61  | 0.33 | 0.14 | 0.44  | 0.52 | 0.52 | 0.37 | 0.00  |
| HCAZ <sub>12</sub>                    | r | -0.17    | -0.14    | 0.20     | 0.16     | 0.11     | 0.22     | 0.00     | -0.08    | 0.04 | 0.01 | 0.08 | 0.10 | 0.00 | 0.01  | 0.00 | 0.02 | 0.03 | 0.01 | 0.00  | 0.00 | 0.00 | 0.06  | 0.00 | 0.00 | 0.00 | 0.00  |
|                                       | p | <0.001** | <0.001** | <0.001** | <0.001** | <0.001** | <0.001** | 0.94     | 0.03*    | 0.67 | 0.95 | 0.39 | 0.30 | 0.63 | 0.95  | 0.87 | 0.78 | 0.77 | 0.27 | 0.76  | 0.98 | 0.46 | 0.35  | 0.54 | 0.40 | 0.85 | 0.93  |
| HCAZ <sub>24</sub>                    | r | -0.10    | -0.08    | 0.18     | 0.14     | 0.13     | 0.18     | 0.01     | -0.06    | 0.07 | 0.01 | 0.07 | 0.12 | 0.00 | 0.02  | 0.03 | 0.00 | 0.05 | 0.03 | -0.05 | 0.02 | 0.18 | 0.13  | 0.00 | 0.00 | 0.00 | 0.00  |
|                                       | p | 0.01*    | 0.04*    | <0.001** | <0.001** | <0.001** | <0.001** | 0.83     | 0.12     | 0.48 | 0.94 | 0.43 | 0.20 | 0.64 | 0.84  | 0.66 | 0.61 | 0.10 | 0.73 | 0.61  | 0.66 | 0.55 | 0.66  | 0.54 | 0.54 | 0.46 | 0.35  |
| Socioeconomic status                  | r | -0.10    | -0.16    | 0.30     | 0.16     | 0.15     | 0.22     | 0.19     | 0.11     | 0.02 | 0.01 | 0.09 | 0.00 | 0.00 | 0.01  | 0.00 | 0.08 | 0.11 | 0.03 | -0.03 | 0.08 | 0.05 | 0.00  | 0.01 | 0.00 | 0.00 | 0.01  |
|                                       | p | 0.02*    | <0.001** | <0.001** | <0.001** | <0.001** | <0.001** | <0.001** | 0.01*    | 0.83 | 0.28 | 0.33 | 0.31 | 0.99 | 0.30  | 0.68 | 0.81 | 0.24 | 0.77 | 0.76  | 0.37 | 0.60 | 0.99  | 0.14 | 0.06 | 0.72 | 0.21  |
| Number of years of maternal education | r | -0.40    | -0.38    | 0.37     | 0.16     | 0.07     | 0.43     | 0.06     | -0.04    | 0.09 | 0.06 | 0.06 | 0.00 | 0.00 | 0.02  | 0.00 | 0.01 | 0.08 | 0.01 | 0.01  | 0.05 | 0.04 | 0.03  | 0.01 | 0.00 | 0.00 | 0.01  |
|                                       | p | <0.001** | <0.001** | <0.001** | <0.001** | 0.09     | <0.001** | 0.15     | 0.31     | 0.31 | 0.50 | 0.55 | 0.45 | 0.80 | 0.95  | 0.39 | 0.39 | 0.09 | 0.10 | 0.96  | 0.62 | 0.69 | 0.77  | 0.05 | 0.54 | 0.06 | 0.59  |
| FCI: varieties of play materials      | r | -0.07    | -0.13    | 0.27     | 0.28     | 0.21     | 0.22     | 0.20     | -0.10    | 0.09 | 0.11 | 0.04 | 0.00 | 0.08 | 0.06  | 0.15 | 0.01 | 0.13 | 0.03 | -0.01 | 0.07 | 0.18 | 0.00  | 0.01 | 0.00 | 0.00 | 0.01  |
|                                       | p | 0.08     | <0.001** | <0.001** | <0.001** | <0.001** | <0.001** | <0.001** | 0.01*    | 0.35 | 0.23 | 0.70 | 0.91 | 0.38 | 0.55  | 0.09 | 0.15 | 0.28 | 0.39 | 0.89  | 0.43 | 0.05 | 0.98  | 0.30 | 0.00 | 0.30 | 0.46  |
| FCI: Play activities                  | r | -0.17    | -0.11    | 0.21     | 0.25     | 0.17     | 0.27     | 0.08     | -0.01    | 0.14 | 0.04 | 0.04 | 0.00 | 0.00 | 0.06  | 0.00 | 0.04 | 0.01 | 0.00 | -0.06 | 0.15 | 0.12 | 0.00  | 0.00 | 0.01 | 0.01 | 0.07  |
|                                       | p | <0.001** | 0.01*    | <0.001** | <0.001** | <0.001** | <0.001** | 0.05     | 0.82     | 0.13 | 0.71 | 0.68 | 0.31 | 0.65 | 0.51  | 0.66 | 0.49 | 0.99 | 0.36 | 0.49  | 0.00 | 0.20 | 0.93  | 0.67 | 0.00 | 0.62 | 0.04  |

|                                             |   |          |       |          |          |      |          |          |       |      |      |      |      |      |      |      |      |       |      |       |      |      |      |      |      |      |      |     |
|---------------------------------------------|---|----------|-------|----------|----------|------|----------|----------|-------|------|------|------|------|------|------|------|------|-------|------|-------|------|------|------|------|------|------|------|-----|
| FCI:<br>Sources<br>of play<br>material<br>s | r | 0.01     | 0.01  | 0.06     | 0.13     | 0.07 | 0.00     | 0.12     | -0.07 | 0.1  | -    | -    | -    | -    | -    | -    | -    | 0.0   | 0.0  | -0.04 | 0.0  | -    | 0.0  | -    | 0.0  | -    | 0.1  | 0.0 |
|                                             | p | 0.74     | 0.77  | 0.16     | <0.001** | 0.06 | 0.98     | <0.001** | 0.07  | 0.25 | 0.81 | 0.82 | 0.72 | 0.04 | 0.60 | 0.66 | 0.17 | 0.39  | 0.87 | 0.65  | 0.79 | 0.09 | 0.87 | 0.74 | 0.54 | 0.22 | 0.58 |     |
| FCI:<br>Househ<br>old<br>books              | r | -0.12    | -0.11 | 0.18     | 0.13     | 0.06 | 0.16     | 0.04     | -0.06 | 0.1  | -    | 0.0  | 0.1  | 0.0  | 0.0  | 0.0  | 0.2  | 0.0   | 0.03 | 0.1   | 0.0  | 0.0  | 0.1  | -    | 0.0  | 0.0  | 0.0  |     |
|                                             | p | <0.001** | 0.01* | <0.001** | <0.001** | 0.14 | <0.001** | 0.30     | 0.15  | 0.20 | 0.30 | 0.51 | 0.29 | 0.57 | 0.50 | 0.94 | 1.00 | 0.03* | 0.91 | 0.79  | 0.11 | 0.37 | 0.78 | 0.24 | 0.52 | 0.93 | 1.00 |     |

r: Pearson correlation (as early life exposures were normally distributed). \*\*p<0.001; \*p<0.05.

LAZ<sub>birth</sub>, LAZ<sub>12</sub>, LAZ<sub>24</sub>: WHO z scores for length at birth, 12 and 24 months; WAZ<sub>birth</sub>, WAZ<sub>12</sub>, WAZ<sub>24</sub>: WHO z scores for weight at birth, 12 and 24 months; HCAZ<sub>birth</sub>, HCAZ<sub>12</sub>, HCAZ<sub>24</sub>: WHO z scores for head circumference at birth, 12 and 24 months. FCI: Family Care Indicators. Socio-economic status: the SES tally provides the number of indicators available from the following list: electricity, improved water source, sanitation, synthetic flooring, improved cooking fuels, transportation and household assets. F: ANOVA test statistic; X<sup>2</sup>: Chi-Square test statistic.

**Table S7 Comparisons of Early Life Exposures between children with delay/low vision and without delay/low vision.**

| Early Life Indicator (Mean, SD)         | Normal vision/no delay | Low vision/any delay | Unadjusted pairwise comparisons <sup>^</sup> | Effect Size (95% CI) |
|-----------------------------------------|------------------------|----------------------|----------------------------------------------|----------------------|
| <b>I. Visual Acuity</b>                 | n=453                  | n=160                |                                              |                      |
| Maternal age*                           | 23.02 (4.07)           | 24.26 (3.91)         | t=-3.35, p=0.001                             | -0.31 (-0.49, -0.13) |
| Parity*                                 | 1.64 (1.32)            | 1.91 (1.53)          | t=-2.14, p=0.03                              | -0.20 (-0.37, -0.02) |
| Gestational age at birth*               | 39.47 (4.94)           | 38.58 (1.84)         | t=2.07, p=0.04                               | 0.21 (0.01, 0.41)    |
| LAZ <sub>12</sub> *                     | 70.39 (2.87)           | 69.48 (3.15)         | t=3.36, p=0.001                              | 0.31 (0.13, 0.49)    |
| LAZ <sub>24</sub> **                    | 80.01 (3.41)           | 78.53 (3.99)         | t=4.48, p<0.001                              | 0.41 (0.23, 0.60)    |
| LAZ <sub>12</sub> **                    | 8.01 (1.04)            | 7.53 (1.21)          | t=4.85, p<0.001                              | 0.45 (0.26, 0.63)    |
| LAZ <sub>24</sub> **                    | 9.82 (1.19)            | 9.32 (1.43)          | t=4.29, p<0.001                              | 0.40 (0.21, 0.58)    |
| HCAZ <sub>birth</sub> **                | 33.32 (1.31)           | 32.85 (1.49)         | t=3.71, p<0.001                              | 0.34 (0.16, 0.53)    |
| HCAZ <sub>12</sub> **                   | 44.06 (1.47)           | 43.41 (1.69)         | t=4.63, p<0.001                              | 0.43 (0.24, 0.61)    |
| HCAZ <sub>24</sub> **                   | 46.12 (1.43)           | 45.70 (1.70)         | t=2.97, p=0.003                              | 0.28 (0.09, 0.46)    |
| SES**                                   | 4.74 (2.86)            | 3.61 (2.52)          | t=4.40, p<0.001                              | 0.41 (0.23, 0.59)    |
| Number of years of maternal schooling** | 5.43 (4.20)            | 1.59 (2.67)          | t=10.83, p<0.001                             | 0.99 (0.81, 1.18)    |
| FCI: Play activities*                   | 5.62 (1.90)            | 5.09 (2.09)          | t=2.95, p=0.003                              | 0.27 (0.09, 0.46)    |
| FCI: Household books*                   | 0.36 (0.79)            | 0.19 (0.74)          | t=2.31, p=0.02                               | 0.21 (0.03, 0.40)    |
| <b>II. Contrast Sensitivity</b>         | n=484                  | n=129                |                                              |                      |
| Maternal age*                           | 23.14 (4.13)           | 23.99 (3.96)         | t=-2.10, p=0.04                              | -0.21 (-0.40, -0.01) |
| Gestational age at birth                | 39.35 (4.75)           | 38.66 (1.59)         | t=1.46, p=0.15                               | 0.16 (-0.06, 0.38)   |
| LAZ <sub>birth</sub> *                  | 47.63 (2.05)           | 47.19 (2.29)         | t=2.10, p=0.04                               | 0.21 (0.01, 0.40)    |
| LAZ <sub>12</sub> **                    | 70.38 (2.87)           | 69.27 (3.20)         | t=3.79, p<0.001                              | 0.38 (0.18, 0.57)    |
| LAZ <sub>24</sub> **                    | 79.93 (3.53)           | 78.45 (3.87)         | t=4.10, p<0.001                              | 0.41 (0.21, 0.61)    |
| WAZ <sub>12</sub> **                    | 7.96 (1.07)            | 7.54 (1.16)          | t=3.91, p<0.001                              | 0.39 (0.19, 0.58)    |
| WAZ <sub>24</sub> *                     | 9.76 (1.24)            | 9.34 (1.30)          | t=3.32, p=0.001                              | 0.33 (0.13, 0.53)    |
| HCAZ <sub>birth</sub> *                 | 33.24 (1.33)           | 32.90 (1.45)         | t=2.49, p=0.01                               | 0.25 (0.05, 0.45)    |
| HCAZ <sub>12</sub> **                   | 43.98 (1.48)           | 43.38 (1.66)         | t=3.99, p<0.001                              | 0.40 (0.20, 0.59)    |
| HCAZ <sub>24</sub> *                    | 46.05 (1.49)           | 45.71 (1.52)         | t=2.33, p=0.02                               | 0.23 (0.04, 0.43)    |
| SES**                                   | 4.73 (2.89)            | 3.43 (2.48)          | t=4.65, p<0.001                              | 0.47 (0.27, 0.66)    |
| Number of years of maternal schooling** | 5.20 (4.22)            | 1.58 (2.80)          | t=9.25, p<0.001                              | 0.91 (0.71, 1.11)    |
| FCI: Varieties of play materials*       | 4.47 (1.65)            | 3.98 (1.62)          | t=2.97, p=0.003                              | 0.30 (0.10, 0.49)    |
| FCI: Play activities*                   | 5.57 (1.86)            | 5.06 (2.22)          | t=2.63, p=0.009                              | 0.26 (0.07, 0.46)    |
| FCI: Household books*                   | 0.33 (0.75)            | 0.16 (0.54)          | t=2.37, p=0.02                               | 0.24 (0.04, 0.43)    |
| <b>III. Cognition</b>                   | n=223                  | n=444                |                                              |                      |
| Parity*                                 | 1.62 (1.32)            | 1.90 (1.48)          | t=-2.42, p=0.02                              | 0.20 (0.04, 0.37)    |
| Gestational age at birth*               | 39.57 (4.97)           | 38.46 (1.75)         | t=2.82, p=0.005                              | -0.27 (-0.45, -0.08) |
| LAZ <sub>birth</sub> **                 | 47.76 (1.89)           | 47.12 (2.38)         | t=3.76, p<0.0001                             | -0.31 (-0.47, -0.15) |
| LAZ <sub>12</sub> **                    | 70.70 (2.79)           | 69.07 (3.06)         | t=6.85, p<0.001                              | -0.56 (-0.73, -0.40) |
| LAZ <sub>24</sub> **                    | 80.38 (3.35)           | 77.96 (3.81)         | t=8.34, p<0.001                              | -0.69 (-0.86, -0.52) |
| WAZ <sub>birth</sub> **                 | 2.85 (0.38)            | 2.73 (0.41)          | t=3.81, p<0.001                              | -0.31 (-0.48, -0.15) |
| WAZ <sub>12</sub> **                    | 8.07 (1.04)            | 7.52 (1.15)          | t=6.31, p<0.001                              | -0.52 (-0.68, -0.36) |

|                                         |               |              |                  |                      |
|-----------------------------------------|---------------|--------------|------------------|----------------------|
| WAZ <sub>24</sub> **                    | 9.91 (1.22)   | 9.21 (1.28)  | t=6.82, p<0.001  | -0.57 (-0.73, -0.40) |
| HCAZ <sub>birth</sub> **                | 33.37 (1.31)  | 32.89 (1.47) | t=4.31, p<0.001  | -0.36 (-0.52, -0.19) |
| HCAZ <sub>12</sub> **                   | 44.11 (1.50)  | 43.50 (1.57) | t=4.88, p<0.001  | -0.40 (-0.57, -0.24) |
| HCAZ <sub>24</sub> **                   | 46.19 (1.47)  | 45.65 (1.53) | t=4.39, p<0.001  | -0.37 (-0.53, -0.20) |
| SES**                                   | 4.93 (2.91)   | 3.4 (2.42)   | t=6.63, p<0.001  | -0.55 (-0.72, -0.39) |
| Number of years of maternal schooling** | 5.52 (4.20)   | 2.31 (3.32)  | t=9.73, p<0.001  | -0.82 (-0.99, -0.65) |
| FCI: Varieties of play materials**      | 4.64 (1.58)   | 3.81 (1.69)  | t=6.16, p<0.001  | -0.51 (-0.68, -0.35) |
| FCI: Play activities**                  | 5.76 (1.82)   | 5.01 (2.18)  | t=4.61, p<0.001  | -0.38 (-0.55, -0.22) |
| FCI: Household books**                  | 0.41 (0.91)   | 0.12 (0.45)  | t=4.38, p<0.001  | -0.37 (-0.53, -0.20) |
| <b>IV. Fine Motor</b>                   | <b>n=84</b>   | <b>n=583</b> |                  |                      |
| LAZ <sub>12</sub> **                    | 70.35 (2.88)  | 68.77 (3.29) | t=-4.55, p<0.001 | -0.54 (-0.77, -0.30) |
| LAZ <sub>24</sub> **                    | 79.90 (3.54)  | 77.23 (3.94) | t=-6.20, p<0.001 | -0.75 (-0.99, -0.51) |
| WAZ <sub>12</sub> **                    | 7.96 (1.06)   | 7.37 (1.27)  | t=-4.59, p<0.001 | -0.54 (-0.77, -0.31) |
| WAZ <sub>24</sub> **                    | 9.77 (1.24)   | 9.03 (1.39)  | t=-4.85, p<0.001 | -0.59 (-0.82, -0.35) |
| HCAZ <sub>12</sub> **                   | 43.99 (1.51)  | 43.33 (1.69) | t=-3.63, p<0.001 | -0.43 (-0.67, -0.20) |
| HCAZ <sub>24</sub> **                   | 46.09 (1.47)  | 45.48 (1.71) | t=-3.36, p=0.001 | -0.41 (-0.64, -0.17) |
| SES**                                   | 4.64 (2.85)   | 2.86 (2.37)  | t=-5.26, p<0.001 | -0.64 (-0.87, -0.40) |
| Number of years of maternal schooling** | 4.69 (4.23)   | 2.67 (3.54)  | t=-3.91, p<0.001 | -0.49 (-0.73, -0.24) |
| FCI: Varieties of play materials**      | 4.51 (1.60)   | 3.30 (1.75)  | t=-6.20, p<0.001 | -0.79 (-0.99, -0.51) |
| FCI: Play activities**                  | 5.63 (1.92)   | 4.63 (2.13)  | t=-4.26, p<0.001 | -0.51 (-0.75, -0.28) |
| FCI: Sources of play materials*         | 2.46 (0.65)   | 2.22 (0.80)  | t=-2.97, p=0.003 | -0.36 (-0.60, -0.12) |
| FCI: Household books*                   | 0.35 (0.84)   | 0.05 (0.27)  | t=-3.12, p=0.002 | -0.38 (-0.61, -0.14) |
| <b>V. Gross Motor</b>                   | <b>n=58</b>   | <b>n=609</b> |                  |                      |
| LAZ <sub>birth</sub> *                  | 47.62 (2.05)  | 46.78 (2.35) | t=-2.94, p=0.003 | -0.40 (-0.67, -0.13) |
| LAZ <sub>12</sub> **                    | 70.34 (2.91)  | 68.15 (2.99) | t=-5.36, p<0.001 | -0.75 (-1.03, -0.47) |
| LAZ <sub>24</sub> **                    | 79.87 (3.53)  | 76.46 (3.95) | t=-6.80, p<0.001 | -0.96 (-1.24, -0.68) |
| WAZ <sub>birth</sub> **                 | 2.83 (0.38)   | 2.62 (0.44)  | t=-3.85, p<0.001 | -0.53 (-0.80, -0.26) |
| WAZ <sub>12</sub> **                    | 7.95 (1.07)   | 7.26 (1.30)  | t=-4.54, p<0.001 | -0.63 (-0.91, -0.36) |
| WAZ <sub>24</sub> **                    | 9.75 (1.25)   | 8.93 (1.37)  | t=-4.63, p<0.001 | -0.65 (-0.93, -0.37) |
| HCAZ <sub>12</sub> **                   | 43.97 (1.52)  | 43.26 (1.70) | t=-3.29, p=0.001 | -0.46 (-0.73, -0.18) |
| HCAZ <sub>24</sub> **                   | 46.07 (1.48)  | 45.36 (1.69) | t=-3.39, p=0.001 | -0.48 (-0.76, -0.20) |
| SES**                                   | 4.61 (2.86)   | 2.44 (1.86)  | t=-5.62, p<0.001 | -0.78 (-1.05, -0.50) |
| FCI: Varieties of play materials**      | 4.47 (1.63)   | 3.26 (1.64)  | t=-5.32, p<0.001 | -0.74 (-1.01, -0.46) |
| FCI: Play activities*                   | 5.58 (1.95)   | 4.79 (2.10)  | t=-2.90, p=0.004 | -0.40 (-0.67, -0.13) |
| <b>VI. Language</b>                     | <b>n=589</b>  | <b>n=78</b>  |                  |                      |
| Parity                                  | 1.69 (1.37)   | 1.71 (1.38)  | t=0.13, p=0.89   | 0.02 (-0.23, 0.26)   |
| Gestational age at birth**              | 41.61 (13.19) | 38.98 (1.89) | t=-3.90, p<0.001 | -0.64 (-0.96, -0.31) |
| LAZ <sub>birth</sub>                    | 47.96 (1.85)  | 47.49 (2.11) | t=-1.86, p=0.06  | -0.22 (-0.46, 0.01)  |
| LAZ <sub>12</sub> *                     | 71.14 (2.39)  | 70.02 (3.03) | t=-3.12, p=0.002 | -0.38 (-0.62, -0.14) |
| LAZ <sub>24</sub> *                     | 80.93 (2.90)  | 79.41 (3.74) | t=-3.44, p=0.001 | -0.42 (-0.66, -0.18) |
| WAZ <sub>birth</sub>                    | 2.85 (0.33)   | 2.80 (0.40)  | t=-1.10, p=0.27  | -0.13 (-0.37, 0.10)  |
| WAZ <sub>12</sub> *                     | 8.20 (0.99)   | 7.85 (1.12)  | t=-2.56, p=0.01  | -0.31 (-0.55, -0.07) |
| WAZ <sub>24</sub> *                     | 10.11 (1.14)  | 9.63 (1.29)  | t=-3.15, p=0.002 | -0.38 (-0.62, -0.14) |
| HCAZ <sub>birth</sub> *                 | 33.52 (1.36)  | 33.27 (1.38) | t=-2.14, p=0.03  | -0.26 (-0.46, -0.02) |

|                                        |              |              |                  |                      |
|----------------------------------------|--------------|--------------|------------------|----------------------|
| HCAZ <sub>12</sub> *                   | 44.27 (1.40) | 43.86 (1.56) | t=-2.19, p=0.03  | -0.27 (-0.50, -0.03) |
| HCAZ <sub>24</sub> **                  | 46.28 (1.32) | 45.99 (1.53) | t=-1.64, p=0.10  | -0.20 (-0.44, 0.04)  |
| SES                                    | 4.43 (2.77)  | 4.39 (3.42)  | t=0.11, p=0.91   | 0.01 (-0.22, 0.25)   |
| Number of years of maternal schooling* | 5.66 (4.04)  | 4.31 (4.20)  | t=-2.62, p=0.009 | -0.32 (-0.57, -0.08) |
| FCI: Varieties of play materials       | 4.55 (1.98)  | 4.34 (1.62)  | t=-1.03, p=0.30  | -0.13 (-0.36, 0.11)  |
| FCI: Play activities**                 | 6.30 (1.75)  | 5.40 (1.98)  | t=-3.78, p<0.001 | -0.46 (-0.70, -0.21) |
| FCI: Household books**                 | 0.58 (1.12)  | 0.28 (0.74)  | t=-3.21, p=0.001 | -0.39 (-0.63, -0.15) |
| VI. Positive Behaviour                 | n=494        | n=173        |                  |                      |
| LAZ <sub>12</sub> *                    | 70.37 (2.87) | 69.53 (3.19) | t=3.20, p=0.001  | 0.28 (0.11, 0.46)    |
| LAZ <sub>24</sub> **                   | 79.95 (3.53) | 78.52 (3.95) | t=4.38, p<0.001  | 0.39 (0.22, 0.57)    |
| SES**                                  | 4.80 (2.81)  | 3.13 (2.68)  | t=5.95, p<0.001  | 0.54 (0.36, 0.71)    |
| FCI: Varieties of play materials**     | 4.59 (1.55)  | 3.69 (1.81)  | t=6.22, p<0.001  | 0.56 (0.38, 0.74)    |
| FCI: Play activities*                  | 5.61 (1.92)  | 5.22 (2.10)  | t=2.22, p=0.03   | 0.20 (0.02, 0.38)    |
| FCI: Sources of play materials*        | 2.48 (0.64)  | 2.28 (0.75)  | t=3.26, p=0.001  | 0.29 (0.12, 0.47)    |
| VII. Negative Behaviour                | n=52         | n=615        |                  |                      |
| LAZ <sub>24</sub> *                    | 79.67 (3.58) | 78.57 (4.70) | t=-2.08, p=0.04  | -0.30 (-0.58, -0.02) |
| HCAZ <sub>birth</sub>                  | 33.45 (1.35) | 33.19 (1.38) | t=1.32, p=0.19   | 0.20 (-0.09, 0.47)   |
| HAZ <sub>12</sub>                      | 44.17 (1.77) | 43.89 (1.52) | t=1.24, p=0.21   | 0.18 (-0.11, 0.47)   |
| SES                                    | 4.44 (2.85)  | 4.16 (2.90)  | t=-0.67, p=0.51  | -0.09 (-0.39, 0.19)  |
| FCI: Varieties of play materials*      | 4.41 (1.63)  | 3.78 (1.95)  | t=-2.57, p=0.01  | -0.38 (-0.67, -0.09) |

^Unadjusted pairwise mean differences and effect sizes with 95% confidence limits were obtained from *t* test assuming equal variance across arms; effect sizes are presented as Cohen's *d*. \*\*p<0.001; \*p<0.05.

FCI: Family Care Indicators. LAZ<sub>birth</sub>, LAZ<sub>12</sub>, LAZ<sub>24</sub>: WHO z scores for length at birth, 12 and 24 months; WAZ<sub>birth</sub>, WAZ<sub>12</sub>, WAZ<sub>24</sub>: WHO z scores for weight at birth, 12 and 24 months; HCAZ<sub>birth</sub>, HCAZ<sub>12</sub>, HCAZ<sub>24</sub>: WHO z scores for head circumference at birth, 12 and 24 months. SES: Socio-economic status, the SES tally provides the number of indicators available from the following list: electricity, improved water source, sanitation, synthetic flooring, improved cooking fuels, transportation and household assets. F: ANOVA test statistic; X<sup>2</sup>: Chi-Square test statistic.
